# Supplementary material for: Extensive and anomalous grounding line retreat at Vanderford Glacier, Vincennes Bay, Wilkes Land, East Antarctica
Source: Copernicus journal article supplement (doi:10.5194/tc-17-3593-2023), 2023-08-26

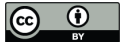

*Supplement of*

## **Extensive and anomalous grounding line retreat at Vanderford Glacier, Vincennes Bay, Wilkes Land, East Antarctica**

**Hannah J. Picton et al.**

*Correspondence to:* Hannah J. Picton ([hannah.picton@ed.ac.uk](mailto:hannah.picton@ed.ac.uk))

The copyright of individual parts of the supplement might differ from the article licence.

# Supplementary Material

**Table S1. Details of the optical satellite imagery used within this study. Note that multiple scenes were required for each year in order to provide full coverage across Vincennes Bay.**

| Date       | Satellite   | Scene ID                                 | Bands   | Resolution (m) | Error (m) |
|------------|-------------|------------------------------------------|---------|----------------|-----------|
| 10/02/2022 | Sentinel 2B | L1C_T49DDG_A025754_20220210T014534       | 4, 3, 2 | 10             | 15        |
| 10/02/2022 | Sentinel 2B | L1C_T49DDF_A025754_20220210T014534       | 4, 3, 2 | 10             | 15        |
| 10/02/2022 | Sentinel 2B | L1C_T48DXM_A025754_20220210T014534       | 4, 3, 2 | 10             | 15        |
| 08/02/2021 | Sentinel 2B | L1C_T49DDF_A020506_20210208T015541       | 4, 3, 2 | 10             | 15        |
| 26/01/2021 | Sentinel 2B | L1C_T49DDG_A020320_20210126T014540       | 4, 3, 2 | 10             | 15        |
| 16/01/2021 | Sentinel 2B | L1C_T48DXM_A020177_20210116T014540       | 4, 3, 2 | 10             | 15        |
| 27/02/2020 | Landsat 8   | LC08_L2SR_105107_20200227_20201016_02_T2 | 4, 3, 2 | 30             | 45        |
| 01/02/2020 | Sentinel 2B | L1C_T49DDF_A015172_20200201T014533       | 4, 3, 2 | 10             | 15        |
| 01/02/2020 | Sentinel 2B | L1C_T48DXM_A015172_20200201T014533       | 4, 3, 2 | 10             | 15        |
| 16/02/2019 | Sentinel 2B | L1C_T49DDG_A010167_20190216T014609       | 4, 3, 2 | 10             | 15        |
| 16/02/2019 | Sentinel 2B | L1C_T48DXL_A010167_20190216T014609       | 4, 3, 2 | 10             | 15        |
| 16/02/2019 | Sentinel 2B | L1C_T48DXM_A010167_20190216T014609       | 4, 3, 2 | 10             | 15        |
| 16/02/2018 | Sentinel 2A | L1C_T49DDG_A013856_20180216T014537       | 4, 3, 2 | 10             | 15        |
| 16/02/2018 | Sentinel 2A | L1C_T49DDF_A013856_20180216T014537       | 4, 3, 2 | 10             | 15        |
| 16/02/2018 | Sentinel 2B | L1C_T48DXM_A013856_20180216T014537       | 4, 3, 2 | 10             | 15        |
| 25/01/2017 | Sentinel 2A | L1C_T49DDF_A008322_20170125T015534       | 4, 3, 2 | 10             | 15        |
| 12/01/2017 | Sentinel 2A | L1C_T49DDG_A008136_20170112T014531       | 4, 3, 2 | 10             | 15        |
| 12/01/2017 | Sentinel 2A | L1C_T48DXM_A008136_20170112T014531       | 4, 3, 2 | 10             | 15        |
| 14/02/2016 | Landsat 8   | LC08_L2SR_107107_20160214_20201016_02_T2 | 4, 3, 2 | 30             | 45        |
| 22/01/2016 | Landsat 8   | LC08_L2SR_106107_20160122_20201016_02_T2 | 4, 3, 2 | 30             | 45        |
| 19/12/2015 | Landsat 8   | LC08_L2SR_108107_20151219_20201016_02_T2 | 4, 3, 2 | 30             | 45        |
| 05/12/2015 | Landsat 8   | LC08_L2SR_106107_20151205_20201016_02_T2 | 4, 3, 2 | 30             | 45        |
| 10/01/2015 | Landsat 8   | LC08_L2SR_107107_20150110_20201016_02_T2 | 4, 3, 2 | 30             | 45        |
| 01/02/2014 | Landsat 8   | LC08_L2SR_106107_20140201_20201016_02_T2 | 4, 3, 2 | 30             | 45        |
| 25/01/2014 | Landsat 8   | LC08_L2SR_105107_20140125_20201016_02_T2 | 4, 3, 2 | 30             | 45        |
| 22/02/2013 | Landsat 7   | LE07_L1GT_106107_20130222_20200908_02_T2 | 3, 2, 1 | 30             | 45        |
| 07/01/2013 | Landsat 7   | LE07_L1GT_104107_20130107_20200908_02_T2 | 3, 2, 1 | 30             | 45        |

|            |               |                                          |         |     |     |
|------------|---------------|------------------------------------------|---------|-----|-----|
| 20/12/2012 | Landsat 7     | LE07_L1GT_106107_20121220_20200908_02_T2 | 3, 2, 1 | 30  | 45  |
| 28/01/2012 | Landsat 7     | LE07_L1GT_105107_20120128_20200909_02_T2 | 3, 2, 1 | 30  | 45  |
| 26/01/2012 | Landsat 7     | LE07_L1GT_107107_20120126_20200909_02_T2 | 3, 2, 1 | 30  | 45  |
| 01/02/2011 | Landsat 7     | LE07_L1GT_106107_20110201_20200910_02_T2 | 3, 2, 1 | 30  | 45  |
| 25/01/2011 | Landsat 7     | LE07_L1GT_105107_20110125_20200910_02_T2 | 3, 2, 1 | 30  | 45  |
| 21/02/2010 | Landsat 7     | LE07_L1GT_107107_20100221_20200911_02_T2 | 3, 2, 1 | 30  | 45  |
| 14/02/2010 | Landsat 7     | LE07_L1GT_106107_20100214_20200911_02_T2 | 3, 2, 1 | 30  | 45  |
| 02/02/2009 | Landsat 7     | LE07_L1GT_107107_20090202_20200912_02_T2 | 3, 2, 1 | 30  | 45  |
| 19/01/2009 | Landsat 7     | LE07_L1GT_105107_20090119_20200912_02_T2 | 3, 2, 1 | 30  | 45  |
| 10/01/2009 | Landsat 7     | LE07_L1GT_106107_20090110_20200912_02_T2 | 3, 2, 1 | 30  | 45  |
| 03/01/2009 | Landsat 7     | LE07_L1GT_105107_20090103_20200912_02_T2 | 3, 2, 1 | 30  | 45  |
| 11/02/2008 | Landsat 7     | LE07_L1GT_104107_20080211_20200913_02_T2 | 3, 2, 1 | 30  | 45  |
| 09/02/2008 | Landsat 7     | LE07_L1GT_106107_20080209_20200912_02_T2 | 3, 2, 1 | 30  | 45  |
| 21/01/2007 | Landsat 7     | LE07_L1GT_106107_20070121_20200913_02_T2 | 3, 2, 1 | 30  | 45  |
| 14/01/2007 | Landsat 7     | LE07_L1GT_105107_20070114_20200913_02_T2 | 3, 2, 1 | 30  | 45  |
| 12/01/2003 | Landsat 7     | LE07_L1GT_104107_20030112_20200916_02_T2 | 3, 2, 1 | 30  | 45  |
| 16/12/2002 | Landsat 7     | LE07_L1GT_107107_20021216_20200916_02_T2 | 3, 2, 1 | 30  | 45  |
| 06/12/2001 | Landsat 7     | LE07_L1GT_106107_20011206_20200917_02_T2 | 3, 2, 1 | 30  | 45  |
| 22/01/2001 | Landsat 7     | LE07_L1GT_104107_20010122_20200917_02_T2 | 3, 2, 1 | 30  | 45  |
| 02/01/2000 | Landsat 7     | LE07_L1GT_106107_20000102_20200918_02_T2 | 3, 2, 1 | 30  | 45  |
| 11/02/1991 | Landsat 5     | LT05_L1GS_105107_19910211_20200915_02_T2 | 3, 2, 1 | 30  | 45  |
| 02/02/1991 | Landsat 5     | LT05_L1GS_106107_19910202_20200915_02_T2 | 3, 2, 1 | 30  | 45  |
| 08/01/1990 | Landsat 4     | LT04_L1GS_104107_19900108_20200916_02_T2 | 3, 2, 1 | 30  | 45  |
| 30/12/1989 | Landsat 4     | LT04_L1GS_105107_19891230_20200916_02_T2 | 3, 2, 1 | 30  | 45  |
| 18/02/1989 | Landsat 4     | LT04_L1GS_108107_19890218_20200916_02_T2 | 3, 2, 1 | 30  | 45  |
| 06/12/1973 | Landsat 1     | LM01_L1GS_112107_19731206_20200908_02_T2 | 7       | 60  | 90  |
| 17/11/1973 | Landsat 1     | LM01_L1GS_111107_19731117_20200909_02_T2 | 7       | 60  | 90  |
| 12/03/1973 | Landsat 1     | LM01_L1GS_113107_19730312_20200909_02_T2 | 7       | 60  | 90  |
| 1963       | KH-5<br>ARGON | ARGON mosaic (Kim <i>et al.</i> , 2007)  | -       | 140 | 210 |

Table S2. Percentage velocity data coverage within defined boxes a) Inland (IN), b) Up-glacier of the grounding line (GL), c) Floating tongue (FT). Missing values reflect velocity data omitted from our analysis due to either < 25% data coverage or associated errors being > 50% of the calculated velocity magnitude (Section 2.3).

## a) IN

| Year | Vanderford | Adams | Anzac | Bond East | Bond West | Underwood |
|------|------------|-------|-------|-----------|-----------|-----------|
| 2000 | 39         | 61    | -     | -         | -         | 49        |
| 2002 | -          | -     | -     | 100       | -         | 97        |
| 2006 | 41         | 65    | -     | 100       | -         | -         |
| 2007 | -          | -     | 100   | 100       | -         | 75        |
| 2008 | 58         | 98    | 100   | 100       | 34        | 97        |
| 2009 | 35         | 68    | 68    | 100       | -         | 85        |
| 2010 | -          | 84    | 100   | 100       | -         | 59        |
| 2011 | 99         | 100   | 100   | 100       | -         | 98        |
| 2012 | 47         | 82    | -     | 100       | 44        | -         |
| 2013 | 100        | 100   | 100   | 100       | 100       | 100       |
| 2014 | 100        | 100   | 100   | 100       | 100       | 100       |
| 2015 | 100        | 100   | 100   | 100       | 100       | 100       |
| 2016 | 100        | 100   | 100   | 100       | 100       | 100       |
| 2017 | 100        | 100   | 100   | 100       | 100       | 100       |
| 2018 | 100        | 100   | 100   | 100       | 100       | 100       |
| 2019 | 100        | 100   | 100   | 100       | 43        | 100       |
| 2020 | 100        | 100   | 100   | 100       | 43        | 100       |
| 2021 | 100        | 100   | 100   | 100       | 32        | 100       |

## b) GL

| Year | Vanderford | Adams | Anzac | Bond East | Bond West | Underwood |
|------|------------|-------|-------|-----------|-----------|-----------|
| 2000 | 100        | 94    | 70    | -         | -         | 27        |
| 2002 | 100        | -     | 67    | 100       | 99        | 91        |
| 2006 | 99         | 98    | 89    | 92        | 100       | -         |
| 2007 | 100        | 98    | 91    | 100       | 100       | 80        |
| 2008 | 100        | 99    | 100   | 100       | 100       | 100       |
| 2009 | 100        | 97    | 99    | 100       | 100       | 94        |
| 2010 | 100        | 99    | 88    | 100       | 100       | 77        |
| 2011 | 100        | 100   | 100   | 100       | 100       | 99        |
| 2012 | 100        | 90    | -     | 100       | 100       | 79        |
| 2013 | 100        | 100   | 100   | 100       | 100       | 100       |
| 2014 | 100        | 100   | 100   | 100       | 100       | 100       |
| 2015 | 100        | 100   | 100   | 100       | 100       | 100       |
| 2016 | 100        | 100   | 100   | 100       | 100       | 100       |
| 2017 | 100        | 100   | 100   | 100       | 100       | 100       |
| 2018 | 100        | 100   | 100   | 100       | 100       | 100       |
| 2019 | 100        | 100   | 100   | 100       | 100       | 100       |
| 2020 | 100        | 100   | 100   | 100       | 100       | 84        |
| 2021 | 100        | 100   | 100   | 100       | 100       | 92        |

## c) FT

| Year | Vanderford | Adams | Anzac | Bond East | Bond West | Underwood |
|------|------------|-------|-------|-----------|-----------|-----------|
| 2000 | 39         | 61    | -     | -         | -         | 49        |
| 2002 | -          | -     | -     | 100       | -         | 97        |
| 2006 | 41         | 65    | -     | 100       | -         | -         |
| 2007 | -          | -     | 100   | 100       | -         | 75        |
| 2008 | 58         | 98    | 100   | 100       | 34        | 97        |
| 2009 | 35         | 68    | 68    | 100       | -         | 85        |
| 2010 | -          | 84    | 100   | 100       | -         | 59        |
| 2011 | 99         | 100   | 100   | 100       | -         | 98        |
| 2012 | 47         | 82    | -     | 100       | 44        | -         |
| 2013 | 100        | 100   | 100   | 100       | 100       | 100       |
| 2014 | 100        | 100   | 100   | 100       | 100       | 100       |
| 2015 | 100        | 100   | 100   | 100       | 100       | 100       |
| 2016 | 100        | 100   | 100   | 100       | 100       | 100       |
| 2017 | 100        | 100   | 100   | 100       | 100       | 100       |
| 2018 | 100        | 100   | 100   | 100       | 100       | 100       |
| 2019 | 100        | 100   | 100   | 100       | 43        | 100       |
| 2020 | 100        | 100   | 100   | 100       | 43        | 100       |
| 2021 | 100        | 100   | 100   | 100       | 32        | 100       |

15 **Figure S1.** Map displaying the different mapping methods employed within BedMachine to map bed elevation across Vincennes Bay (Morlighem, 2020).

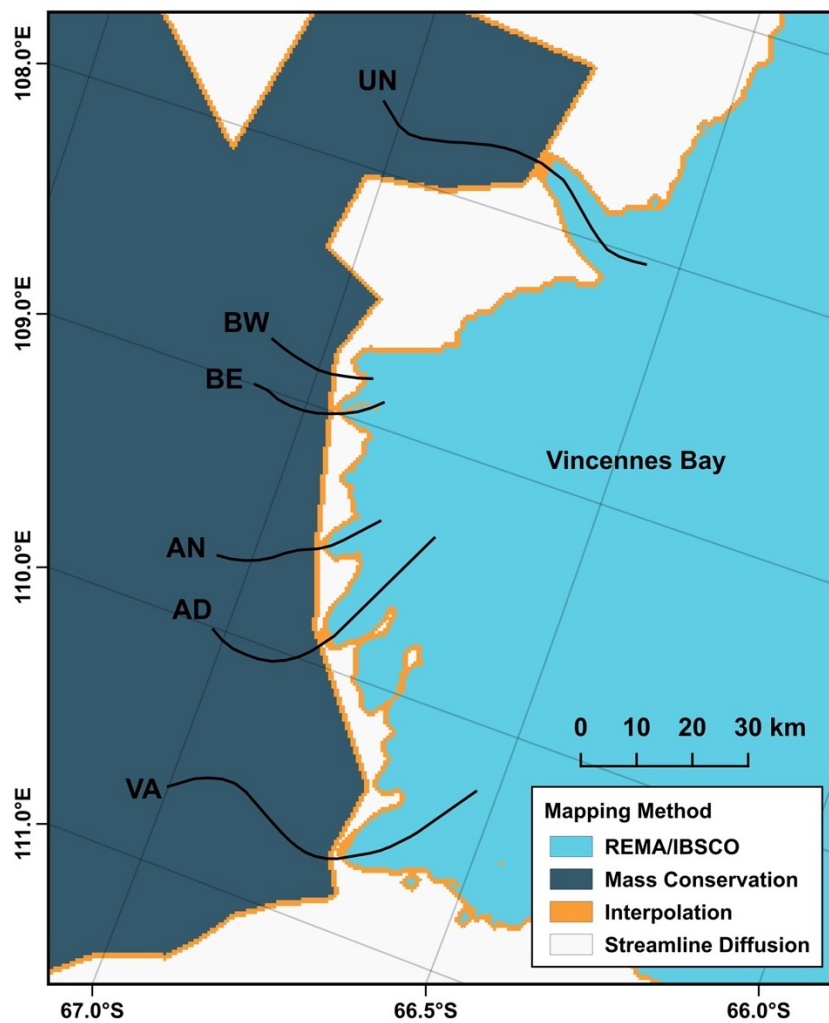

20

25

**Table S3. Width-averaged terminus position change across the Vincennes Bay outlet glaciers. Note that distance is measured relative to the earliest observation, with positive values indicative of advance and negative values indicative of retreat.**

**Width-averaged terminus position change (m)**

| <b>Date</b> | <b>Vanderford</b> | <b>Adams</b> | <b>Anzac</b> | <b>Bond East</b> | <b>Bond West</b> | <b>Underwood</b> |
|-------------|-------------------|--------------|--------------|------------------|------------------|------------------|
| 10/02/2022  | 674.9             | -3754.4      | 2096.9       | -657.7           | -183.9           | -848.1           |
| 08/02/2021  | -                 | -4140.5      | 2071.7       | -972.9           | -682.4           | -                |
| 26/01/2021  | -311.1            | -            | -            | -                | -                | -                |
| 16/01/2021  | -                 | -            | -            | -                | -                | 1941.5           |
| 27/02/2020  | -1209.4           | -            | -            | -                | -                | -                |
| 01/02/2020  | -                 | -2365.9      | 2306.7       | 422.4            | 110.7            | 3785.3           |
| 16/02/2019  | -1566.2           | -2528.1      | 2310.9       | 123.1            | -143.3           | 2471.0           |
| 16/02/2018  | -2363.9           | -2961.4      | 1976.6       | -253.1           | 476.1            | 1709.0           |
| 25/01/2017  | -                 | -3222.2      | 2392.4       | -685.9           | 409.8            | -                |
| 12/01/2017  | -3356.3           | -            | -            | -                | -                | 136.1            |
| 14/02/2016  | -                 | -3683.8      | 2294.0       | -1087.7          | -359.0           | 656.1            |
| 22/01/2016  | -886.0            | -            | -            | -                | -                | -                |
| 19/12/2015  | -                 | -            | -            | -                | -                | 372.7            |
| 05/12/2015  | -992.4            | -            | -            | -                | -                | -                |
| 10/01/2015  | -                 | -3817.8      | 2111.5       | -516.7           | -576.8           | -                |
| 01/02/2014  | -                 | -            | -            | -                | -                | -813.5           |
| 25/01/2014  | -2165.5           | -2583.4      | 1796.7       | -468.0           | -565.9           | -                |
| 22/02/2013  | -                 | -2855.7      | 1466.5       | -273.9           | -64.2            | -2096.0          |
| 07/01/2013  | -1952.6           | -            | -            | -                | -                | -                |
| 20/12/2012  | -1992.8           | -            | -            | -                | -                | -                |
| 28/01/2012  | -                 | -3251.1      | 1139.2       | -891.9           | -988.8           | -                |
| 26/01/2012  | -                 | -            | -            | -                | -                | -2605.6          |
| 01/02/2011  | -                 | -            | -            | 97.5             | -151.6           | -2492.0          |
| 25/01/2011  | -2277.6           | -3560.1      | 886.2        | -                | -                | -                |
| 21/02/2010  | -                 | -            | -            | -                | -                | -1827.1          |
| 14/02/2010  | -2590.0           | -3513.3      | 678.3        | -394.6           | -306.0           | -                |
| 02/02/2009  | -                 | -            | -            | -411.3           | 396.0            | -                |
| 19/01/2009  | 235.2             | -            | -            | -                | -                | -                |
| 10/01/2009  | -                 | -            | -            | -                | -                | -811.0           |
| 03/01/2009  | -                 | -3047.7      | 2003.1       | -                | -                | -                |
| 11/02/2008  | -552.6            | -            | -            | -                | -                | -                |
| 09/02/2008  | -                 | -3550.7      | 1717.5       | 112.8            | -10.5            | -1575.0          |
| 21/01/2007  | -                 | -            | -            | -388.9           | -392.7           | -349.5           |
| 14/01/2007  | 1312.9            | -2166.7      | 1537.3       | -                | -                | -                |
| 12/01/2003  | 1445.9            | -            | -            | -                | -                | -                |
| 16/12/2002  | -                 | -2224.3      | 2175.5       | -680.5           | -594.3           | -857.5           |
| 06/12/2001  | -                 | -2618.3      | 2042.4       | -402.6           | 455.1            | -1924.9          |
| 22/01/2001  | 1944.3            | -            | -            | -                | -                | -                |
| 02/01/2000  | 931.9             | -1948.1      | 1356.9       | 358.1            | -547.0           | -1784.5          |
| 11/02/1991  | -5102.0           | -983.6       | 501.7        | -709.1           | -199.1           | -                |
| 02/02/1991  | -                 | -            | -            | -                | -                | -3592.8          |
| 08/01/1990  | -4325.7           | -            | -            | -                | -                | -                |
| 30/12/1989  | -                 | -1200.2      | 130.6        | -1047.1          | -113.8           | -                |
| 18/02/1989  | -                 | -            | -            | -                | -                | -1747.9          |
| 06/12/1973  | -1078.5           | 2511.8       | 1165.9       | -                | -                | -                |
| 17/11/1973  | -                 | -            | -            | 0.0              | 0.0              | -                |
| 12/03/1973  | -                 | -            | -            | -                | -                | 0.0              |
| 01/10/1963  | 0.0               | 0.0          | 0.0          | -                | -                | -                |

Figure S2. Monthly surface elevation anomalies observed in each IN box at (a) Vanderford Glacier, (b) Adams Glacier, (c) Anzac Glacier, (d) Bond East Glacier, (e) Bond West Glacier, and (f) Underwood Glacier between 1992 and 2020. Elevation anomalies are calculated relative to the long-term 1992-2017 mean. Bold lines represent 24-month rolling means.

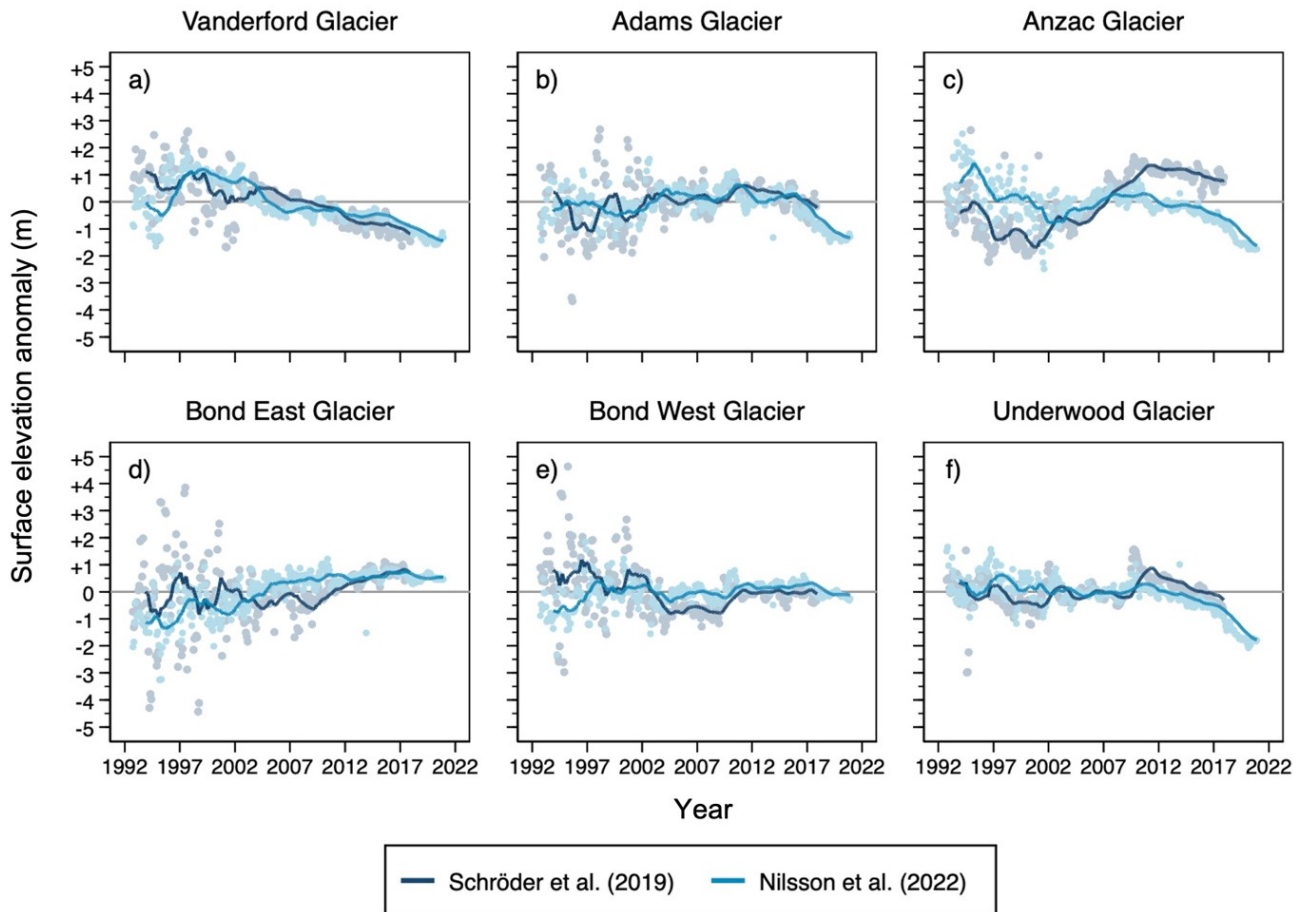

Supplement: Supplementary file 1 [file tc-17-3593-2023-supplement.pdf]
